# Supplementary material
Source: MDPI journal article supplement (https://www.mdpi.com/2504-5377/6/4/65)
Supplement: s1 [file s1]

# Effect of Acyl Chain Length on Hydrophobized Cashew Gum Self-Assembling Nanoparticles: Colloidal Properties and Amphotericin B Delivery

Ana R. Richter <sup>1</sup>, José G. Veras-Neto <sup>1</sup>, Jeanlex S. Sousa <sup>2</sup>, Josilayne F. S. Mendes <sup>3</sup>, Raquel O. S. Fontenelle <sup>3</sup>, Stéphanie A. N. M. Silva <sup>4</sup>, José D. B. Marinho Filho <sup>4</sup>, Ana J. Araújo <sup>4</sup>, Judith P. A. Feitosa <sup>1</sup>, Haroldo C. B. Paula <sup>1</sup>, Francisco M. Goycoolea <sup>5</sup>, Regina C. M. de Paula <sup>1,\*</sup>

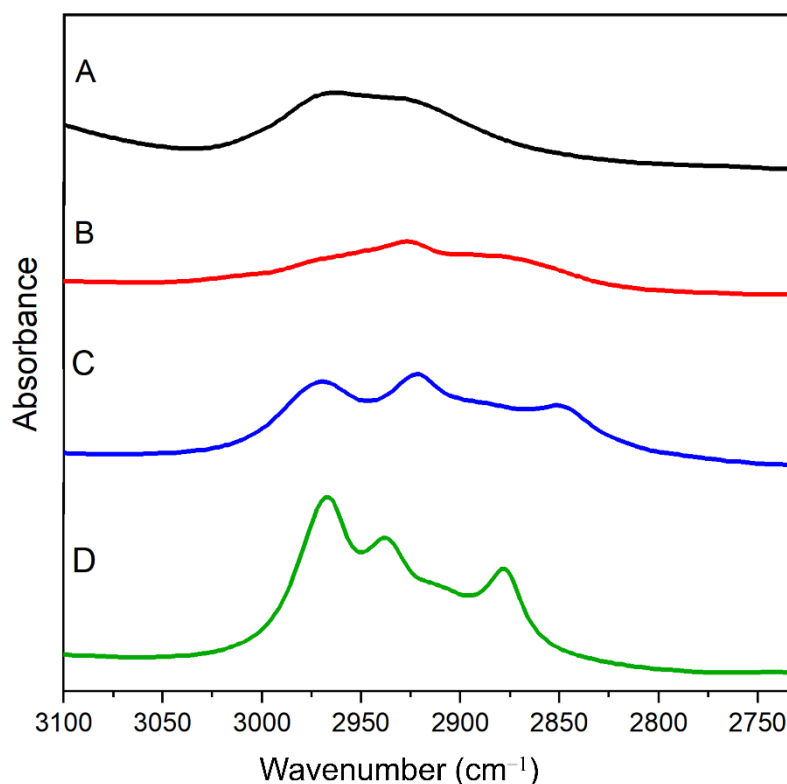

**Figure S1.** FT-IR spectra expansion in the range of 3100- 2750 cm<sup>-1</sup> for (A) CG; (B) CGAc; (C) CGProp, (D) CGBut.
